# Supplementary material for: Intercalated supramolecular compounds of kaolinite with ethanolamine and ethylene glycol: structures and dielectric properties
Source: Royal Society of Chemistry journal article supplement (doi:10.1039/c3dt52930d), 2014-01-01
Supplement: c3dt52930d.pdf [file c3dt52930d.pdf]

## ESI

# Intercalated supramolecular compounds of kaolinite with ethanolamine and ethyleneglycol: structures and dielectric properties

Qiao Qiao,<sup>a</sup> Hao Yang,<sup>a</sup> Jian-Lan Liu,<sup>\*a</sup> Shun-Ping Zhao,<sup>a</sup> Xiao-Ming Ren,<sup>\*a,b,c</sup>

<sup>a</sup> State Key Laboratory of Materials-Oriented Chemical Engineering and College of Science, Nanjing University of Technology, Nanjing 210009, P. R. China

<sup>b</sup> College of Materials Science and Engineering, Nanjing University of Technology, Nanjing 210009, P. R. China

<sup>c</sup> State Key Laboratory & Coordination Chemistry Institute, Nanjing University, Nanjing 210093, P. R. China

Tel.: +86 25 58139476

Fax: +86 25 58139481

Email: [xmren@njut.edu.cn](mailto:xmren@njut.edu.cn)

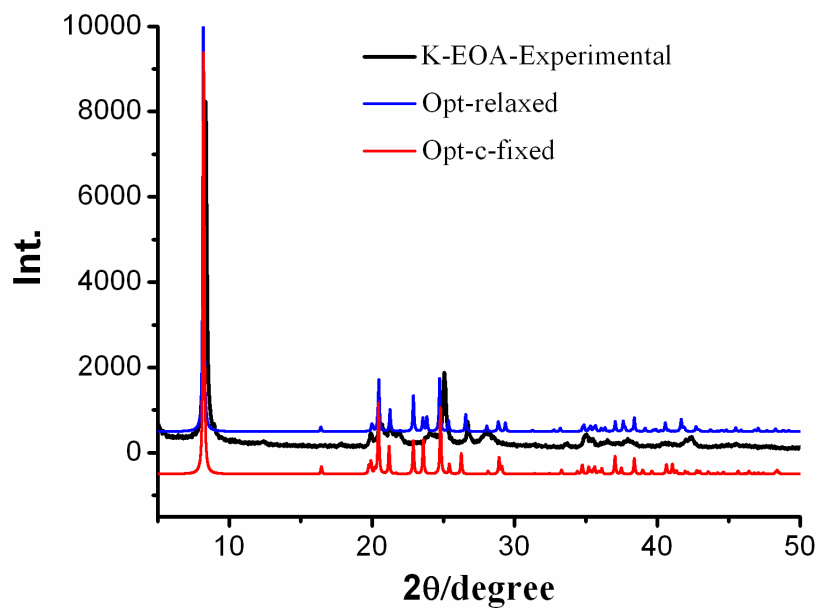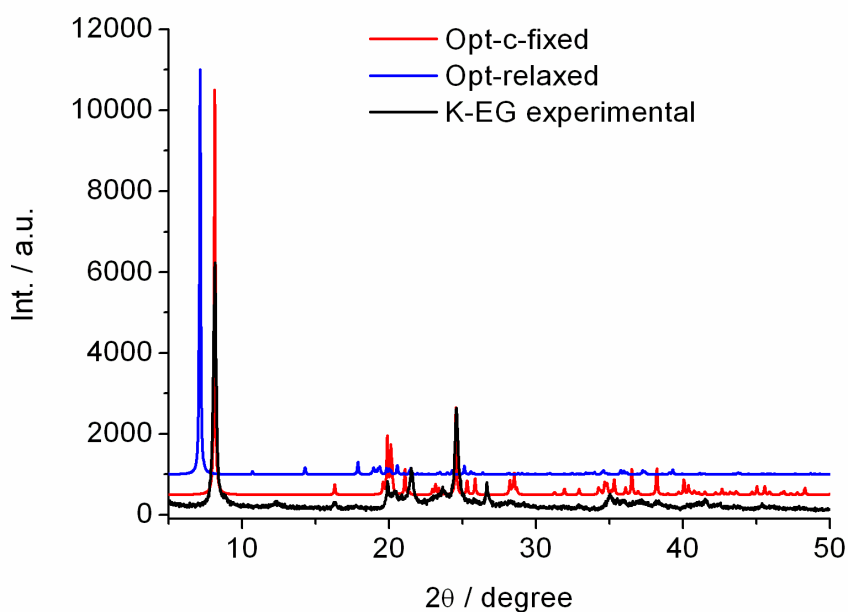

**Figure S1** Experimental and calculated PXRD patterns (upper) K-EOA and (down) K-EG (Opt-relaxed: all unit cell parameters are relaxed during the optimization process; Opt-c-fixed: all unit cell parameters, except for c-axis length which was set to be the value obtained from PXRD measurement, are relaxed during the optimization process).

**Table S1:** Unit cell parameters of kaolinites from single crystal structure analysis at 1.5 K<sup>1</sup> as well as K-EOA and K-EG from the DFT calculation using the second optimization strategy.

|                  | Kaolinite <sup>1</sup> | K-EOA    | K-EG     |
|------------------|------------------------|----------|----------|
| a/Å              | 5.1535                 | 5.1459   | 5.1113   |
| b/Å              | 8.9419                 | 8.8908   | 8.9443   |
| c/Å              | 7.3906                 | 11.1673  | 10.1571  |
| $\alpha$ /°      | 91.926                 | 92.8062  | 91.8470  |
| $\beta$ /°       | 105.046                | 104.7271 | 105.0810 |
| $\gamma$ /°      | 89.797                 | 89.1149  | 88.6808  |
| V/Å <sup>3</sup> | 328.708                | 493.5375 | 448.0751 |

#### References

1. D. L. Bish, *Clays and Clay Miner.* 1993, **41**, 738.
